# Supplementary material
Source: Springer Nature journal article supplement (https://www.springermedizin.de/resource/supplementary/12908_2010_103_MOESM6_ESM.pdf/9525166)

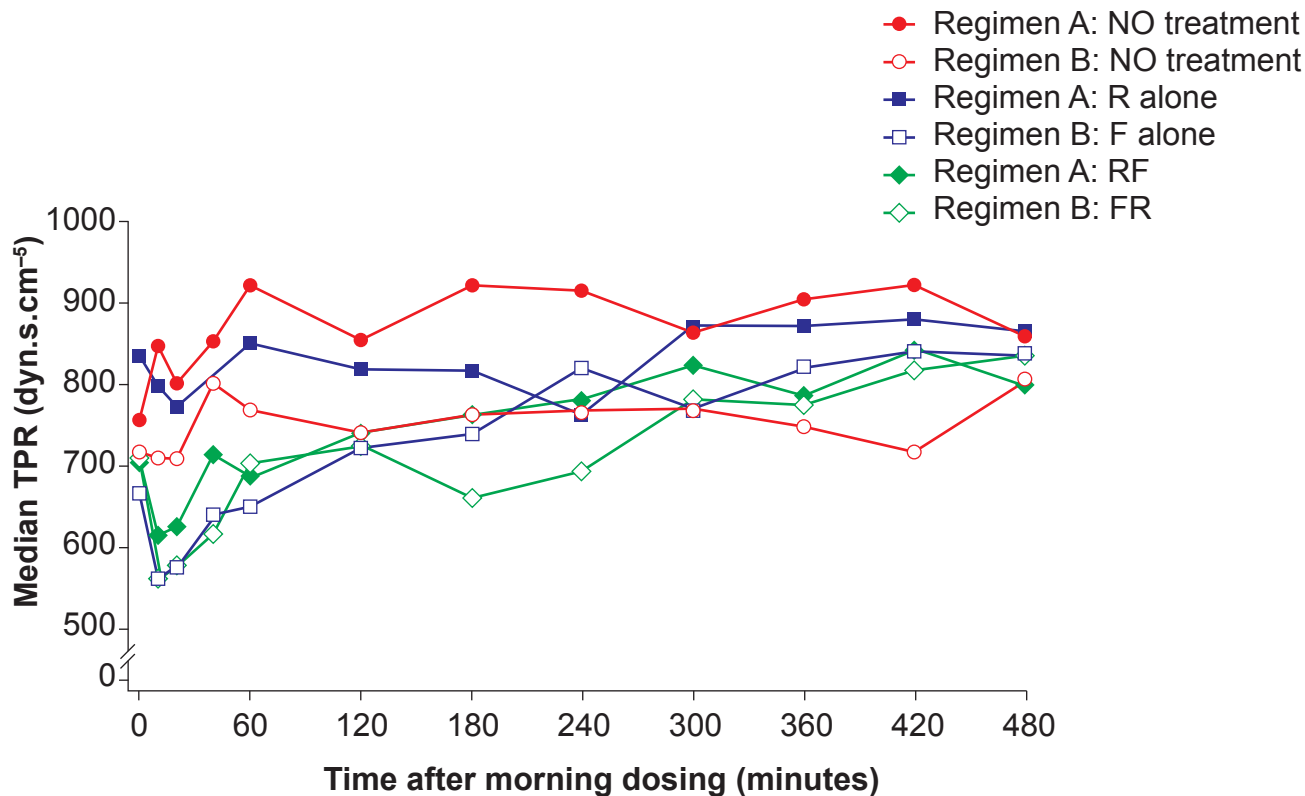

Supplement: MOESM6 [file 9525166]
